# Supplementary material for: Valorization of Grape Pomace as a Renewable Source of Techno-Functional and Antioxidant Pectins
Source: MDPI journal article supplement (doi:10.3390/antiox12040957), 2023-04-19
Supplement: s1 [file s1]

## **Supplementary information of the manuscript**

# **“Valorization of Grape Pomace as a Renewable Source of Techno-Functional and Antioxidant Pectins”**

**Roberto Megías-Pérez**<sup>1</sup>

**Alvaro Ferreira-Lazarte**<sup>1,2</sup>

**Mar Villamiel**<sup>1,\*</sup>

<sup>1</sup> Instituto de Investigación en Ciencias de la Alimentación (CIAL) (CSIC-UAM), Nicolás Cabrera, 9, Campus de la Universidad Autónoma de Madrid, 28049 Madrid, Spain

<sup>2</sup> Singapore Institute of Food and Biotechnology Innovation, Agency for Science, Technology and Research, 31 Biopolis Way, #01-02, Nanos, Singapore 138669, Singapore

\* Correspondence: m.villamiel@csic.es; Tel.: 910017902

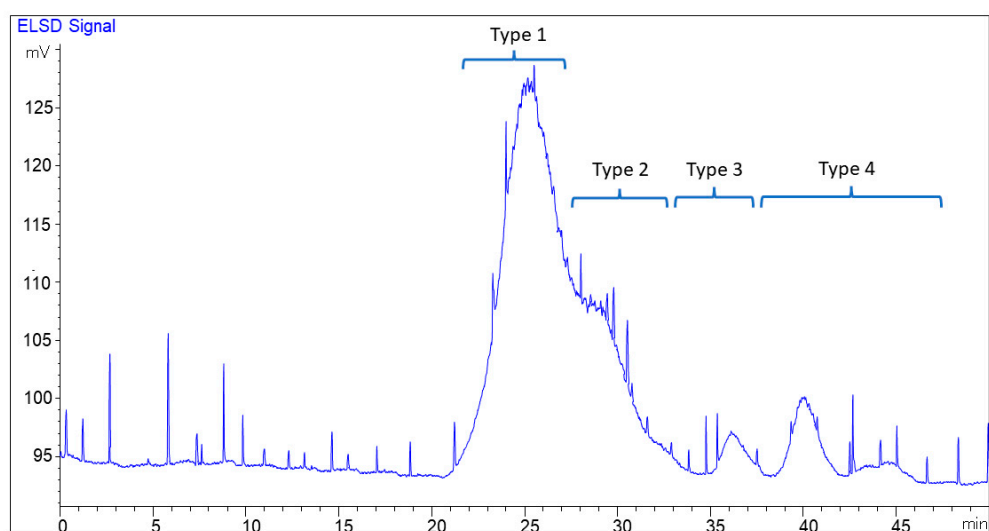

Figure S1. HPLC-ELSD chromatogram of GP pectin extracted with Oxalic Acid. On the figure are indicated the different types of fragments observed.

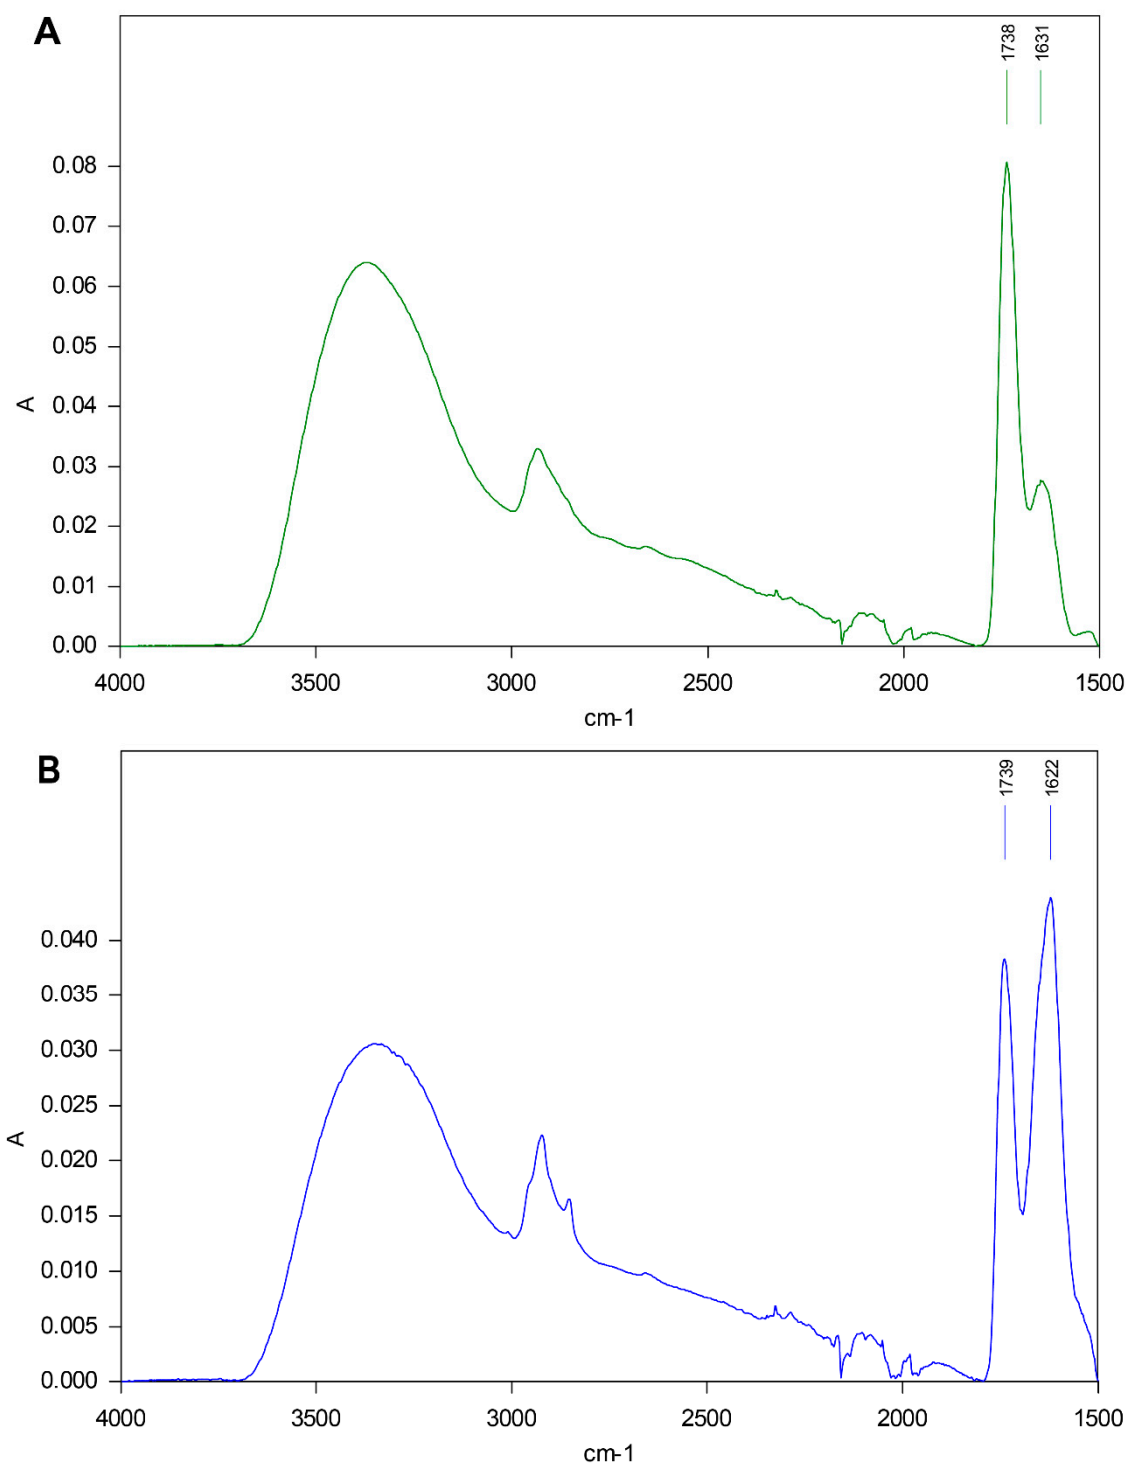

Figure S2. ATR-FTIR spectra (signal between 4000-1500 cm<sup>-1</sup>) of pectin obtained with A) Nitric Acid, B) Oxalic Acid

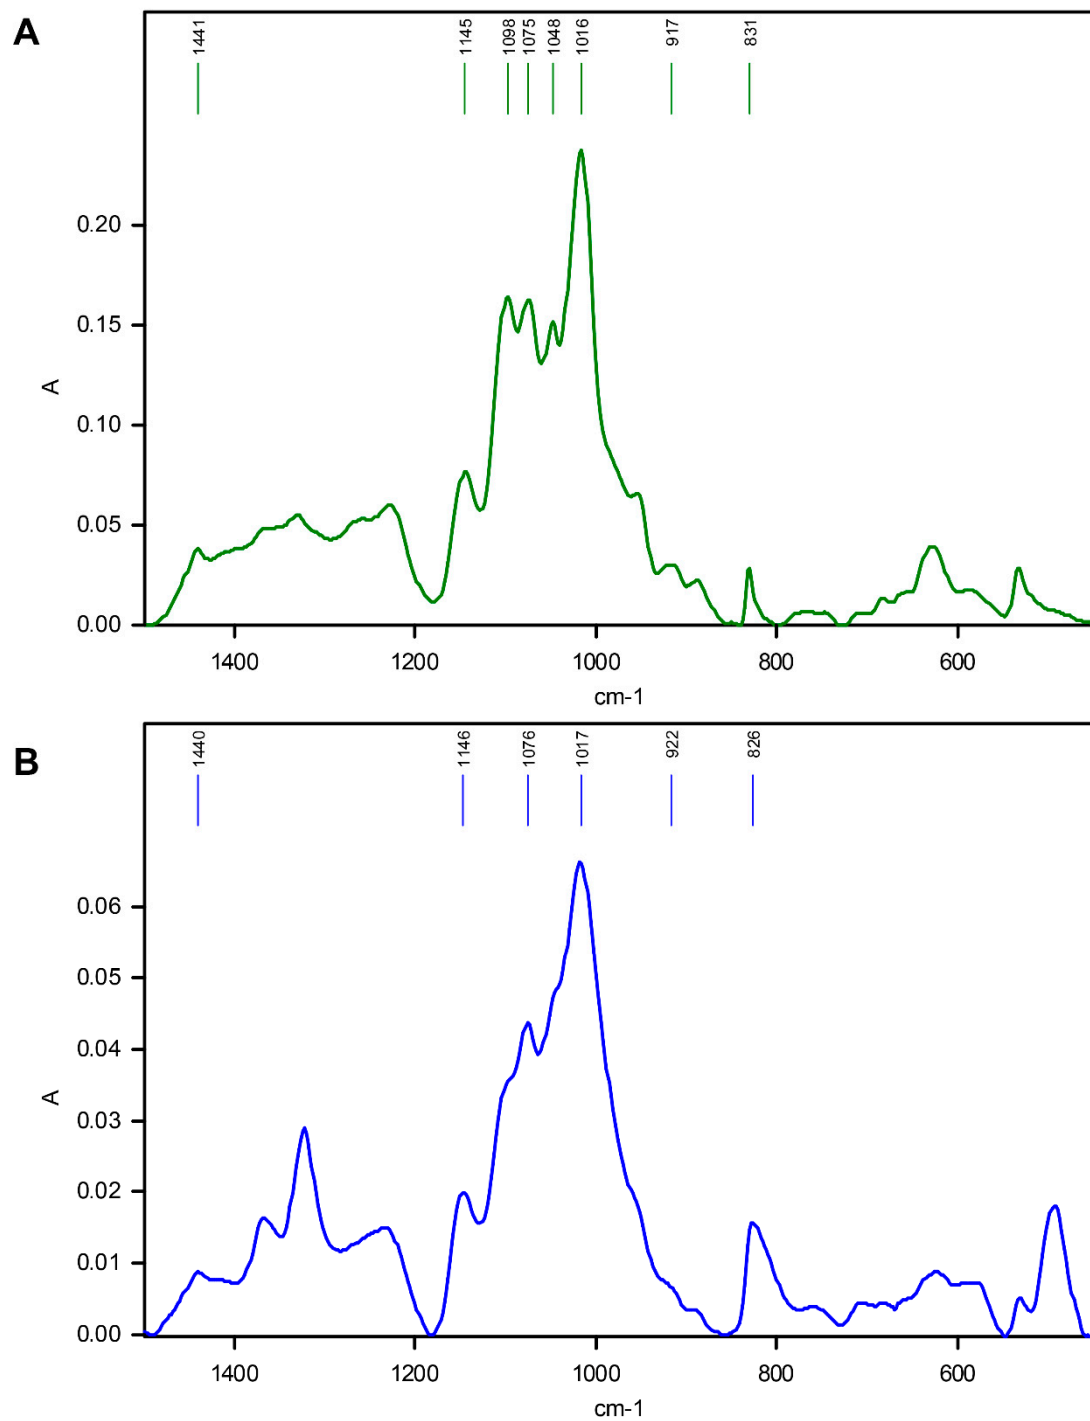

Figure S3. ATR-FTIR spectra (signal between 1500-450  $\text{cm}^{-1}$ ) of pectin obtained with A) Nitric Acid, B) Oxalic Acid
